# Supplementary material for: σ-Hole⋯π and lone pair⋯π interactions in benzylic halides
Source: Royal Society of Chemistry journal article supplement (doi:10.1039/c5ob00366k), 2015-01-01
Supplement: c5ob00366k1.pdf [file c5ob00366k1.pdf]

## Electronic Supplementary Information

### $\sigma$ -Hole $\cdots\pi$ and Lone Pair $\cdots\pi$ Interactions in Benzylic Halides

*Teresa Montoro, Gloria Tardajos, Andrés Guerrero, María del Rosario Torres, Cástor Salgado,  
Israel Fernández\* and José Osío Barcina\**

*Departamento de Química Orgánica, Facultad de Ciencias Químicas, Universidad  
Complutense de Madrid, Ciudad Universitaria s/n, 28040 Madrid, (Spain)*

E-mail: [josio@quim.ucm.es](mailto:josio@quim.ucm.es), [israel@quim.ucm.es](mailto:israel@quim.ucm.es)

#### Contents

|                                                                                     |     |
|-------------------------------------------------------------------------------------|-----|
| X-Ray data collection and structure refinement for <b>1</b> , <b>2</b> and <b>3</b> | S2  |
| Figures S1-S4 (Histograms from CSD searches)                                        | S3  |
| UV-vis spectra of compounds <b>1-4</b>                                              | S5  |
| Calculated rotation barriers of <b>5-N</b> and <b>6-N</b>                           | S5  |
| $^1\text{H-NMR}$ and $^{13}\text{C-NMR}$ spectra of compounds                       | S6  |
| Cartesian coordinates and total energies                                            | S12 |

## X-Ray data collection and structure refinement

Data collection for **1**, was carried out at room temperature on a Bruker Smart CCD diffractometer and on a Xcalibur, Atlas CCD diffractometer for **2** and **3**, using in all cases graphite-monochromated Mo-K $\alpha$  radiation ( $\lambda=0.71073$  Å) operating at 50 kV and 20 mA for **1** and at 50 kV and 40 mA for **2** and **3**. The exposure times were 20s for **1** and 6.0s and 17.10s **2** and **3** in omega. A summary of the fundamental crystal and refinement data is given in Table 1. The structures were solved by direct methods and refined by full-matrix least-squares procedures on F<sup>2</sup> (SHELXL-97)\*. All non-hydrogen atoms were refined anisotropically. All hydrogen atoms were included in their calculated positions and refined riding on the respective carbon atoms.

“CCDC 1007894-1007896 contains the supplementary crystallographic data for this paper. These data can be obtained free of charge from The Cambridge Crystallographic Data Centre via [www.ccdc.cam.ac.uk/data\\_request/cif](http://www.ccdc.cam.ac.uk/data_request/cif).”

\*G.M. Sheldrick, ‘SHELX97, Program for Refinement of Crystal Structure’, University of Göttingen, Göttingen, Germany, 1997

Table 1. Crystal data and Refinement Data for **1**, **2** and **3**.

| Crystal Data                                        | <b>1</b>                          | <b>2</b>                           | <b>3</b>                           |
|-----------------------------------------------------|-----------------------------------|------------------------------------|------------------------------------|
| empirical formula                                   | C <sub>13</sub> H <sub>15</sub> I | C <sub>13</sub> H <sub>15</sub> Br | C <sub>13</sub> H <sub>15</sub> Cl |
| formula wt                                          | 298.15                            | 251.16                             | 206.70                             |
| crystal system                                      | Monoclinic                        | Monoclinic                         | Monoclinic                         |
| space group                                         | P2(1)/n                           | P2(1)/n                            | P2(1)/n                            |
| <i>a</i> /Å                                         | 6.350(5)                          | 6.201(5)                           | 6.3915(4)                          |
| <i>b</i> /Å                                         | 31.01(3)                          | 30.714(5)                          | 6.8582(5)                          |
| <i>c</i> /Å                                         | 6.458(5)                          | 6.350(5)                           | 24.607(2)                          |
| $\alpha$ /°                                         | 90                                | 90                                 | 90                                 |
| $\beta$ /°                                          | 112.53(1)                         | 114.351(5)                         | 94.259(7)                          |
| $\gamma$ /°                                         | 90                                | 90                                 | 90                                 |
| <i>V</i> /Å <sup>3</sup>                            | 1175(2)                           | 1102(1)                            | 1075.7(1)                          |
| <i>Z</i>                                            | 4                                 | 4                                  | 4                                  |
| <i>D<sub>c</sub></i> /g/cm <sup>3</sup>             | 1.686                             | 1.514                              | 1.276                              |
| $\mu$ (Mo-K $\alpha$ ) /mm <sup>-1</sup>            | 2.687                             | 3.688                              | 0.311                              |
| F(000)                                              | 584                               | 512                                | 440                                |
| $\theta$ range/°                                    | 1.31 to 25.00                     | 3.58 to 25.01                      | 3.32 to 25.01                      |
| index ranges                                        | -7,-36,-7 to<br>5, 33, 7          | -5,-36,-7 to<br>7, 36, 6           | -7,-6,-29 to<br>7, 8, 25           |
| reflections collected                               | 6319                              | 4416                               | 4401                               |
| unique reflections [Rint]                           | 2055<br>[Rint = 0.1078]           | 1866<br>[R(int) = 0.0247]          | 1891<br>[R(int) = 0.0356]          |
| completeness to theta                               | 98.7%                             | 95.7%                              | 99.8%                              |
| data/restraints/params                              | 2055 / 0 / 127                    | 1866 / 0 / 127                     | 1891 / 0 / 127                     |
| Goodness-of-fit on F <sup>2</sup>                   | 0.997                             | 0.997                              | 0.998                              |
| R1 (reflns obsd)<br>[I>2 $\sigma$ (I)] <sup>a</sup> | 0.0442 (1483)                     | 0.0360 (1474)                      | 0.0439 (1343)                      |
| wR2 (all data) <sup>b</sup>                         | 0.1018                            | 0.0865                             | 0.0959                             |

$$^a R1 = \frac{\sum ||F_o| - |F_c||}{\sum |F_o|} \quad ^b wR2 = \left\{ \frac{\sum [w(F_o^2 - F_c^2)^2]}{\sum [w(F_o^2)]} \right\}$$

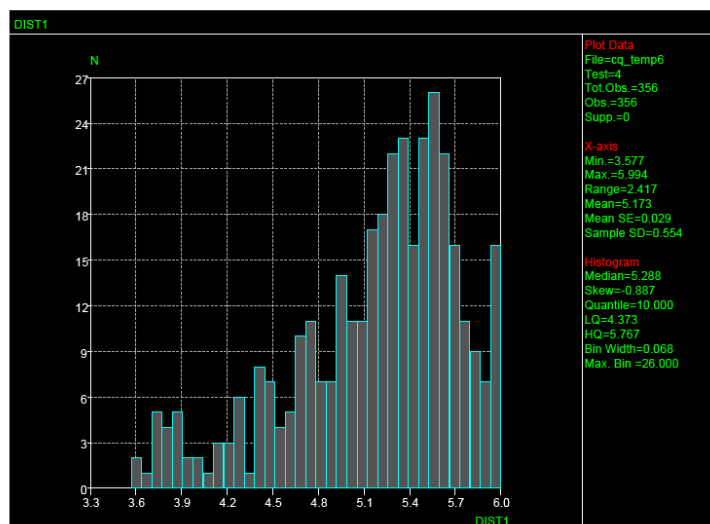

**Figure S1** Histogram from a CSD search representing the intermolecular I... $\pi$  (phenyl centroid) distance in benzylic iodides.

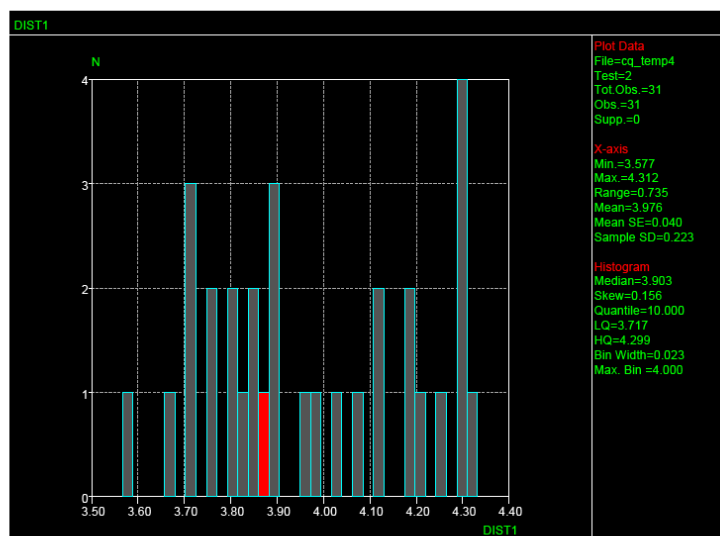

**Figure S2** Histogram from a CSD search representing the intermolecular I... $\pi$  (phenyl centroid) distance in benzylic iodides in the region around the sum of the corresponding van der Waals radii ( $3.85 \pm 0.5 \text{ \AA}$ ).

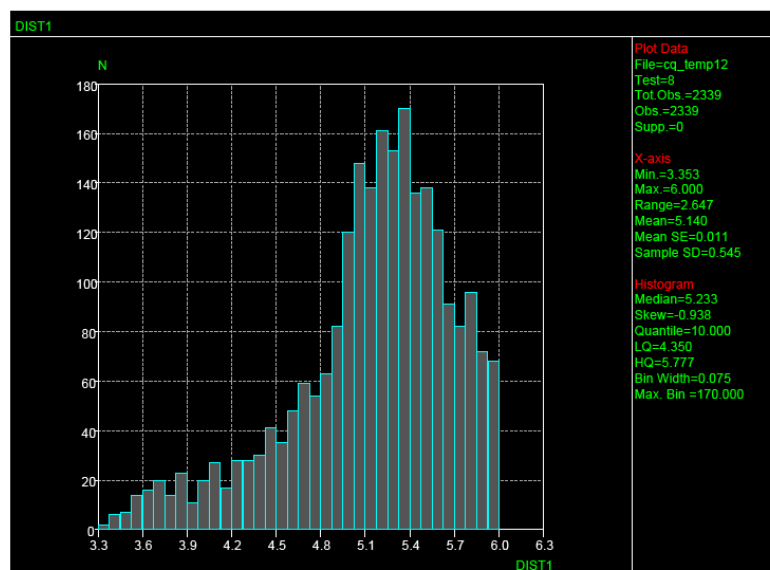

**Figure S3** Histogram from a CSD search representing the intermolecular Br... $\pi$  (centroid) distance in benzylic bromides.

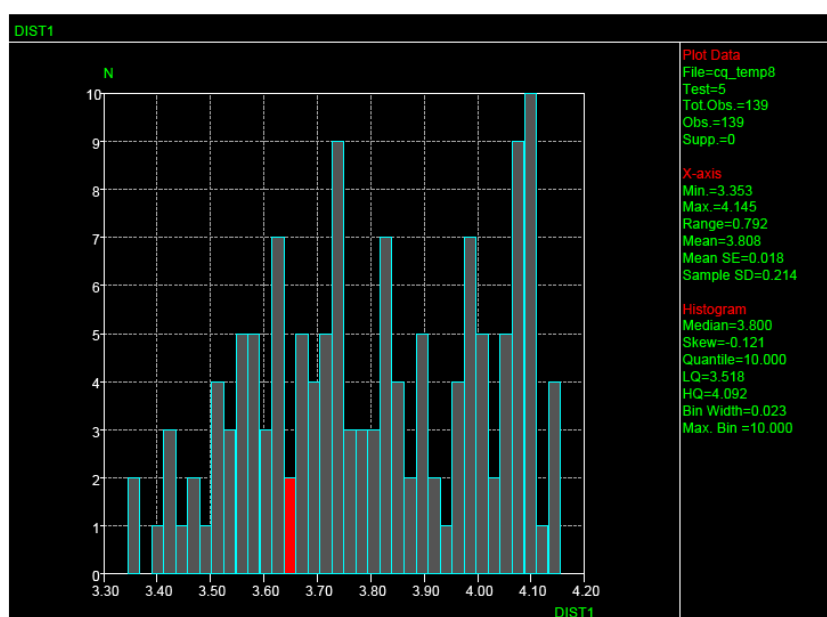

**Figure S4** Histogram from a CSD search representing the intermolecular Br... $\pi$  (phenyl centroid) distance in benzylic bromides in the region around the sum of the corresponding van der Waals radii ( $3.65 \pm 0.5$  Å).

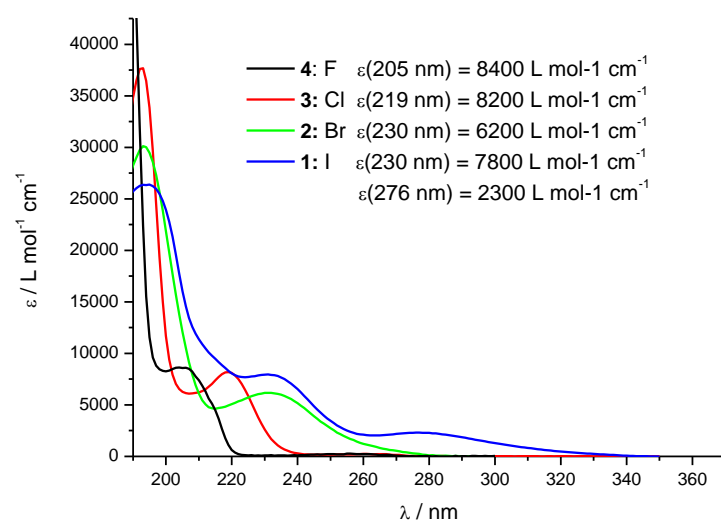

**Figure S5** UV-Vis spectra of benzylic halides **1-4** showing the  $\beta$  (or  $^1B_b$ ) bands.

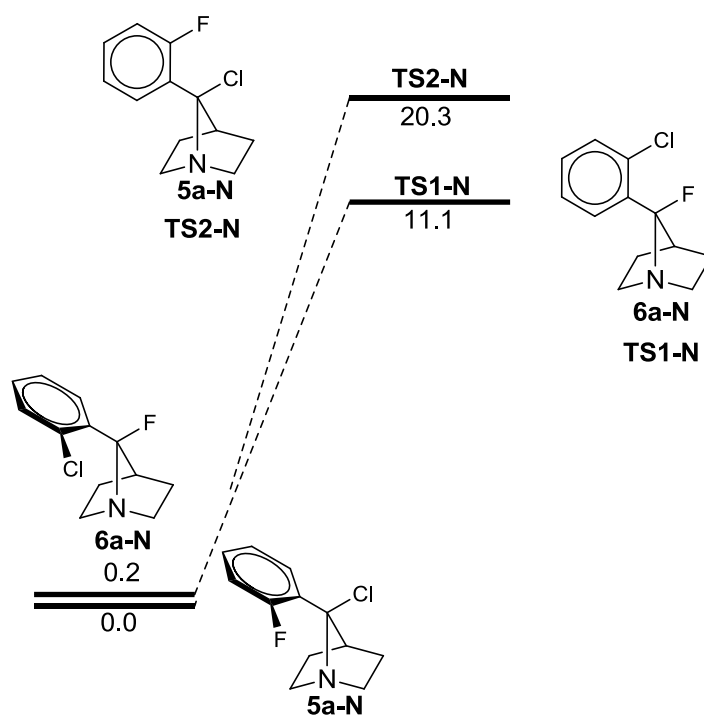

**Figure S6** Calculated (single point) rotation barriers of **5-N** and **6-N**.

$^1\text{H}$ -NMR and  $^{13}\text{C}$ -NMR spectra of compound **1**

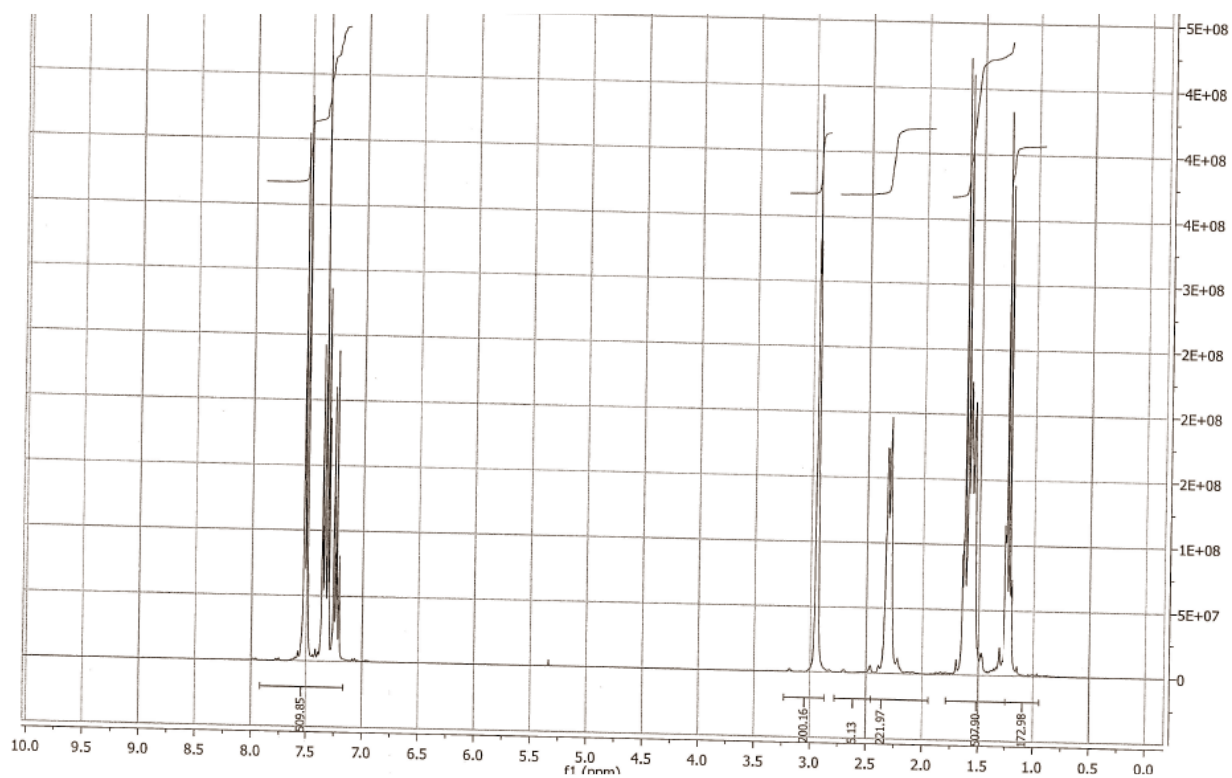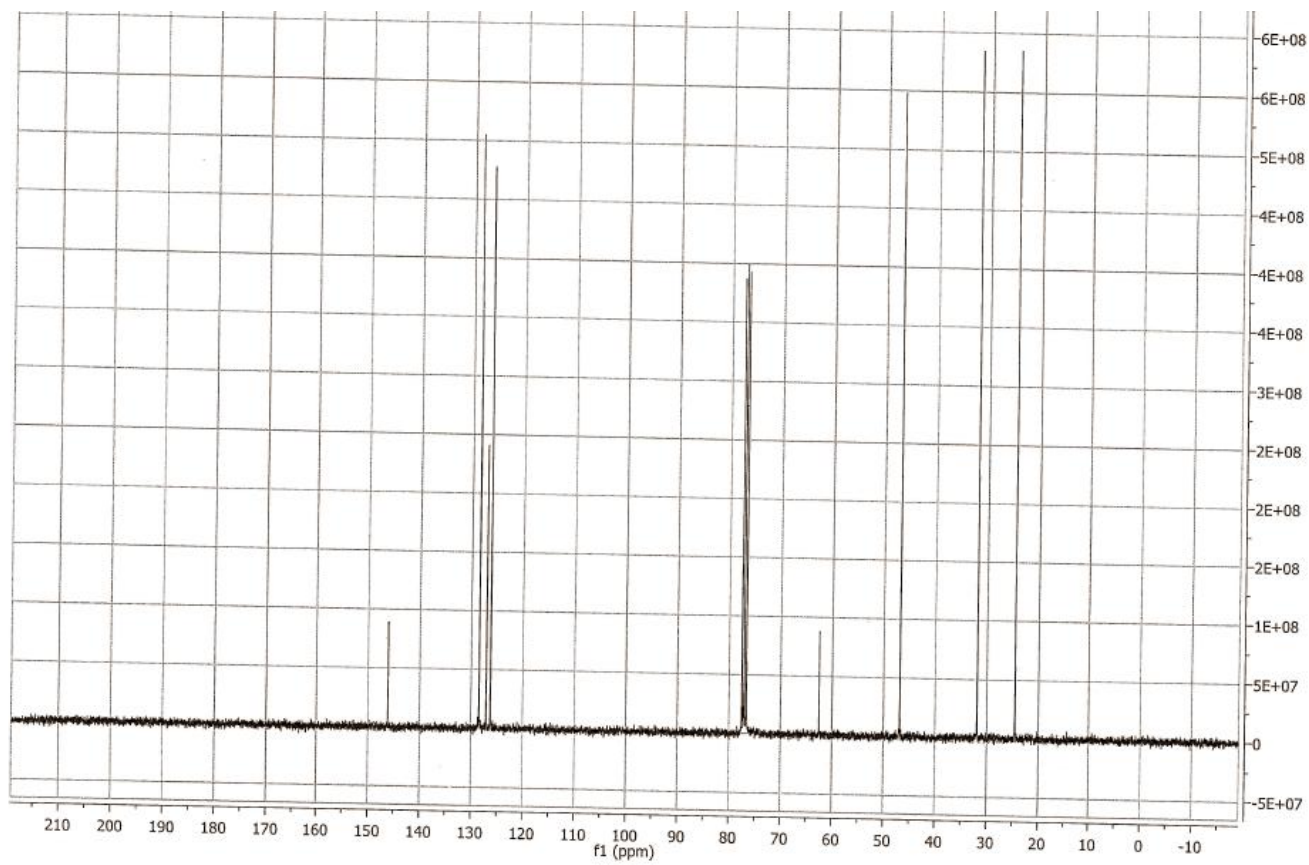

$^1\text{H}$ -NMR and  $^{13}\text{C}$ -NMR spectra of compound **2**

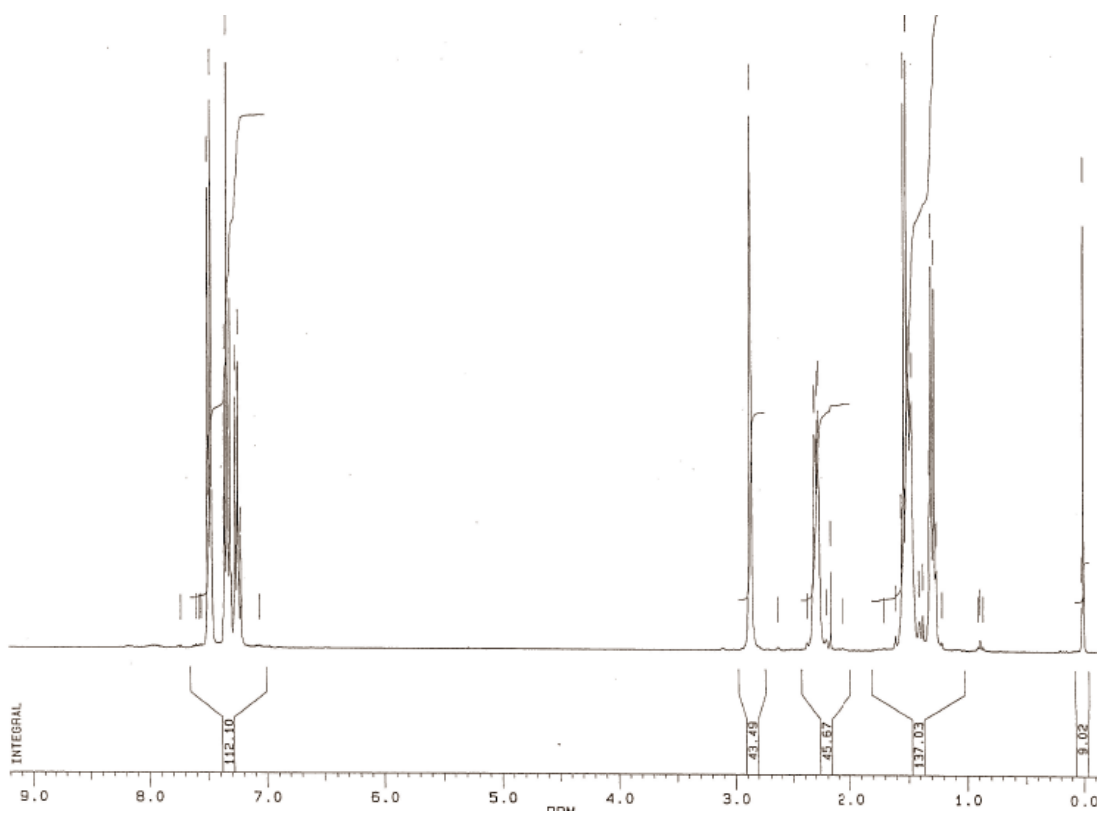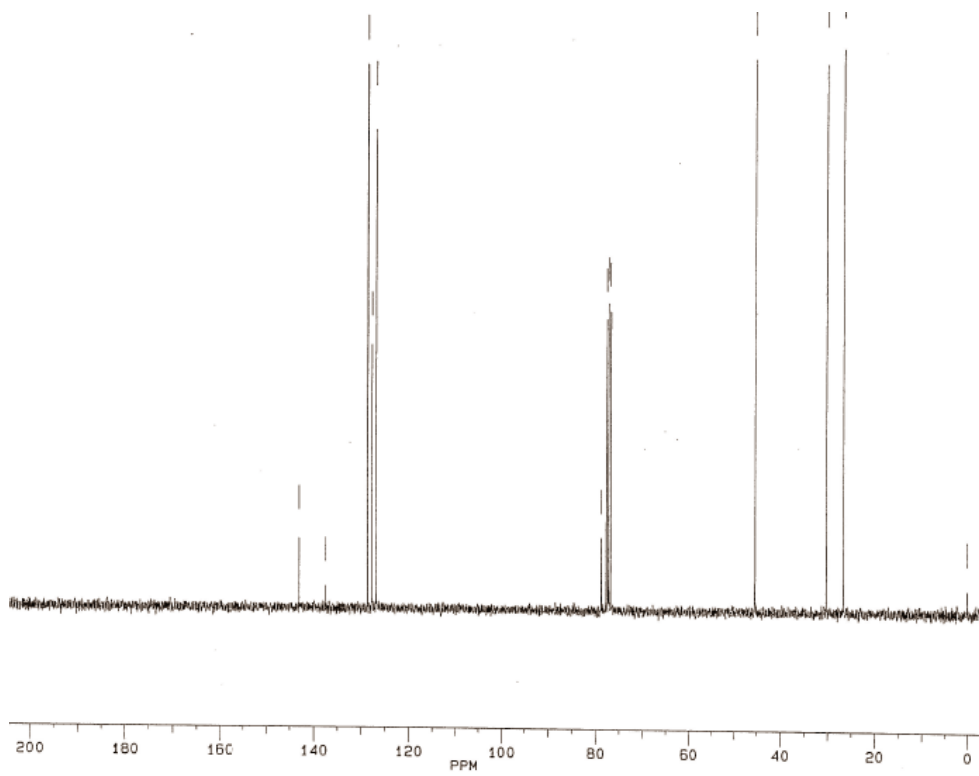

$^1\text{H}$ -NMR and  $^{13}\text{C}$ -NMR spectra of compound 4

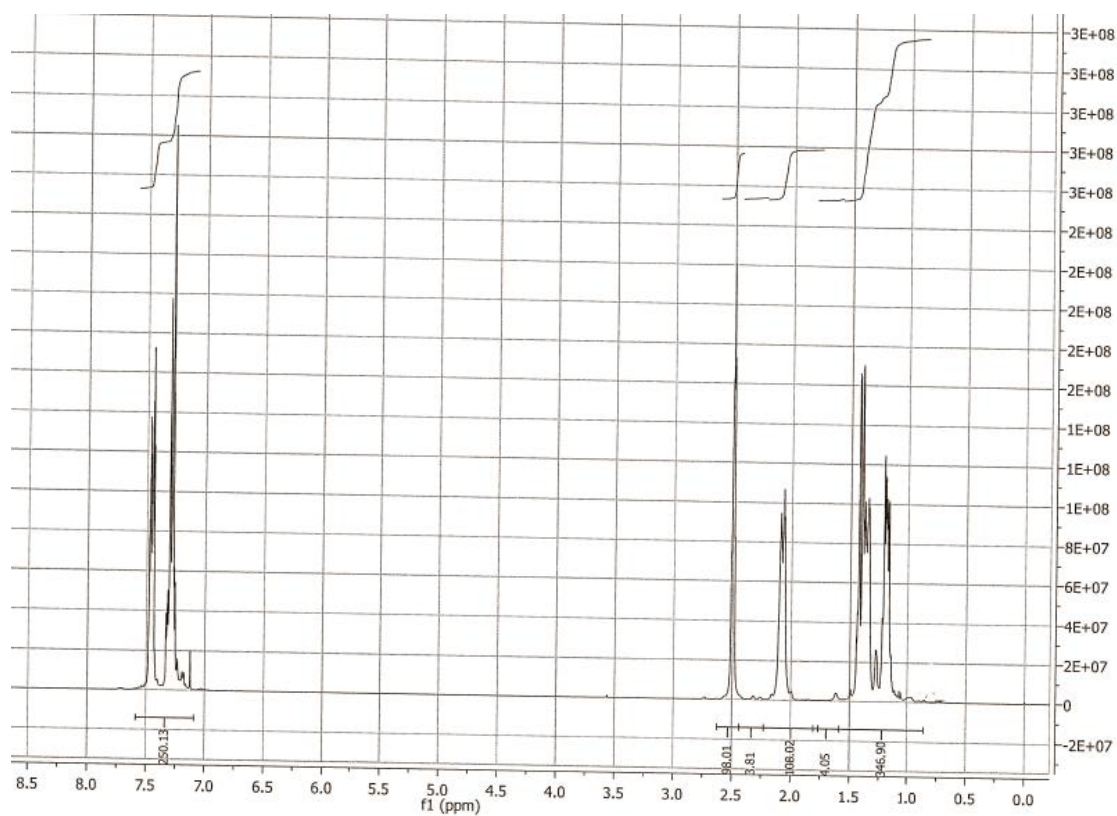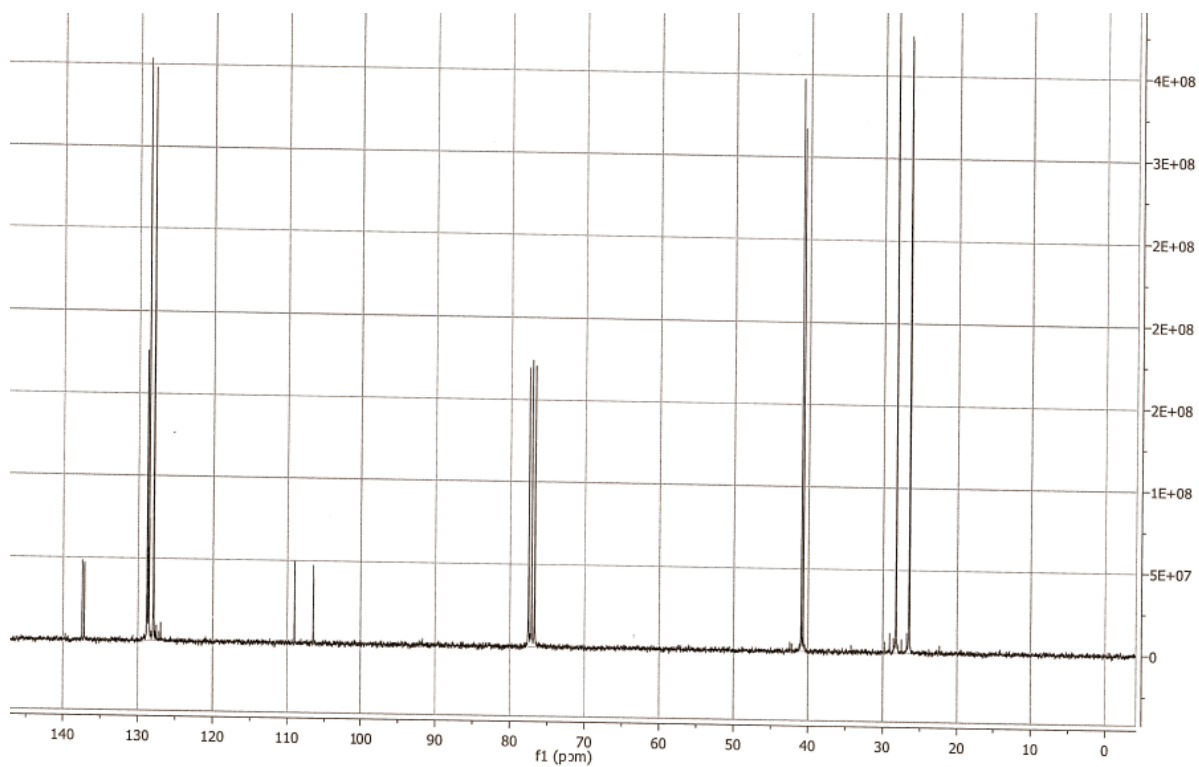



$^1\text{H}$ -NMR and  $^{13}\text{C}$ -NMR spectra of compound **5**

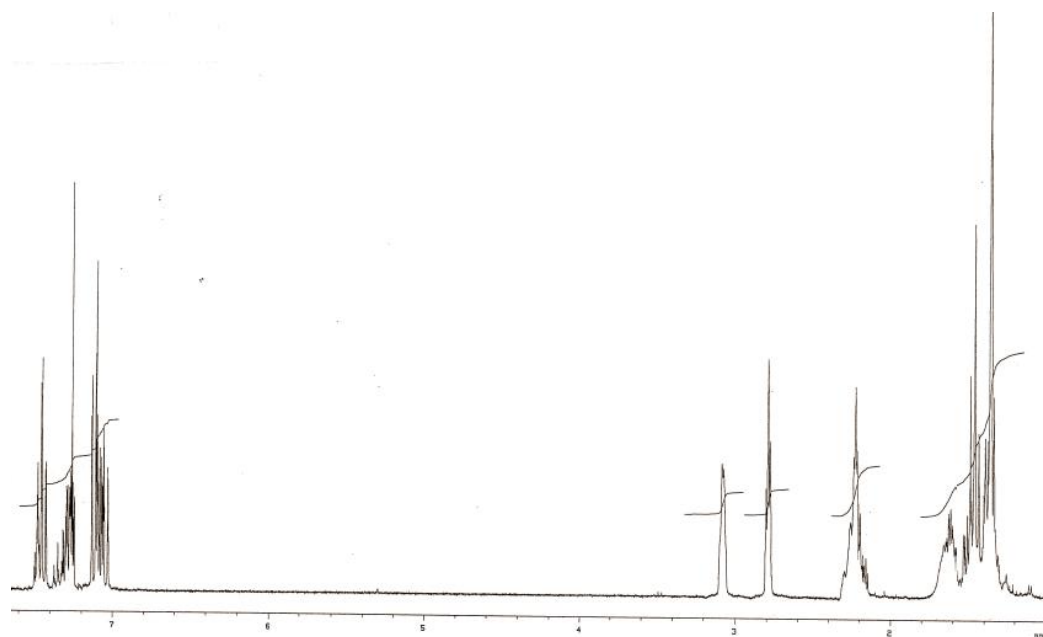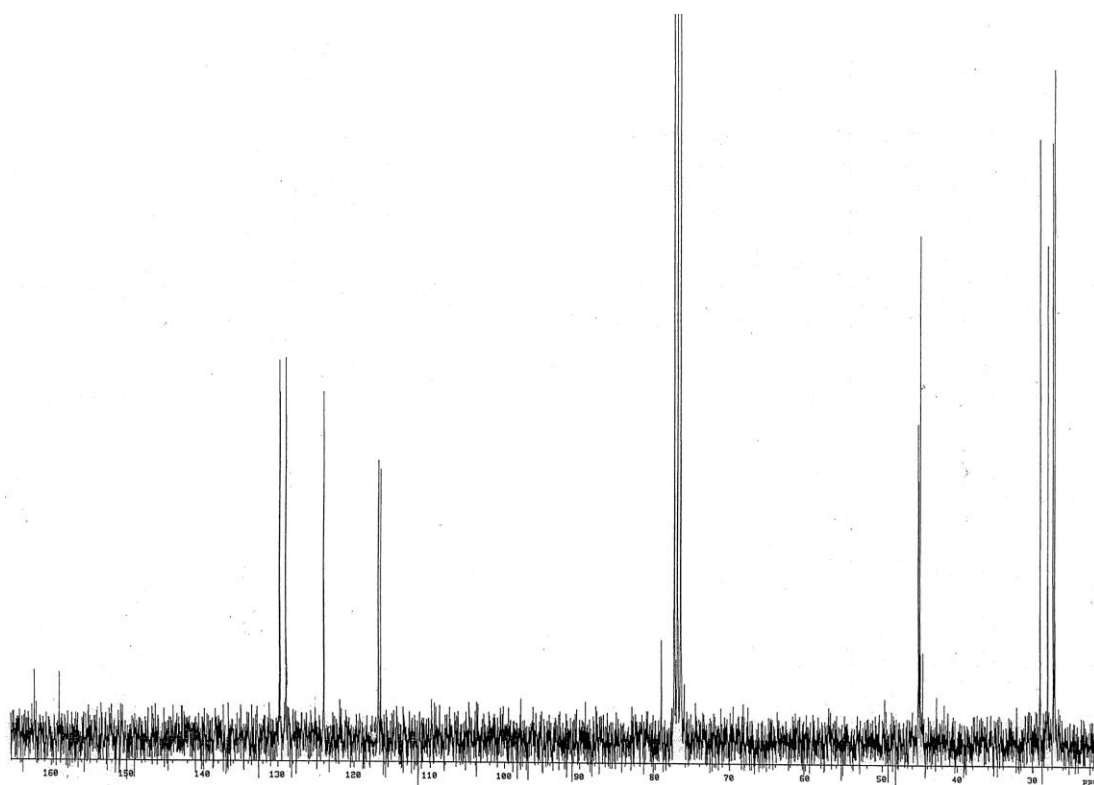

$^1\text{H}$ -NMR and  $^{13}\text{C}$ -NMR spectra of compound **6**

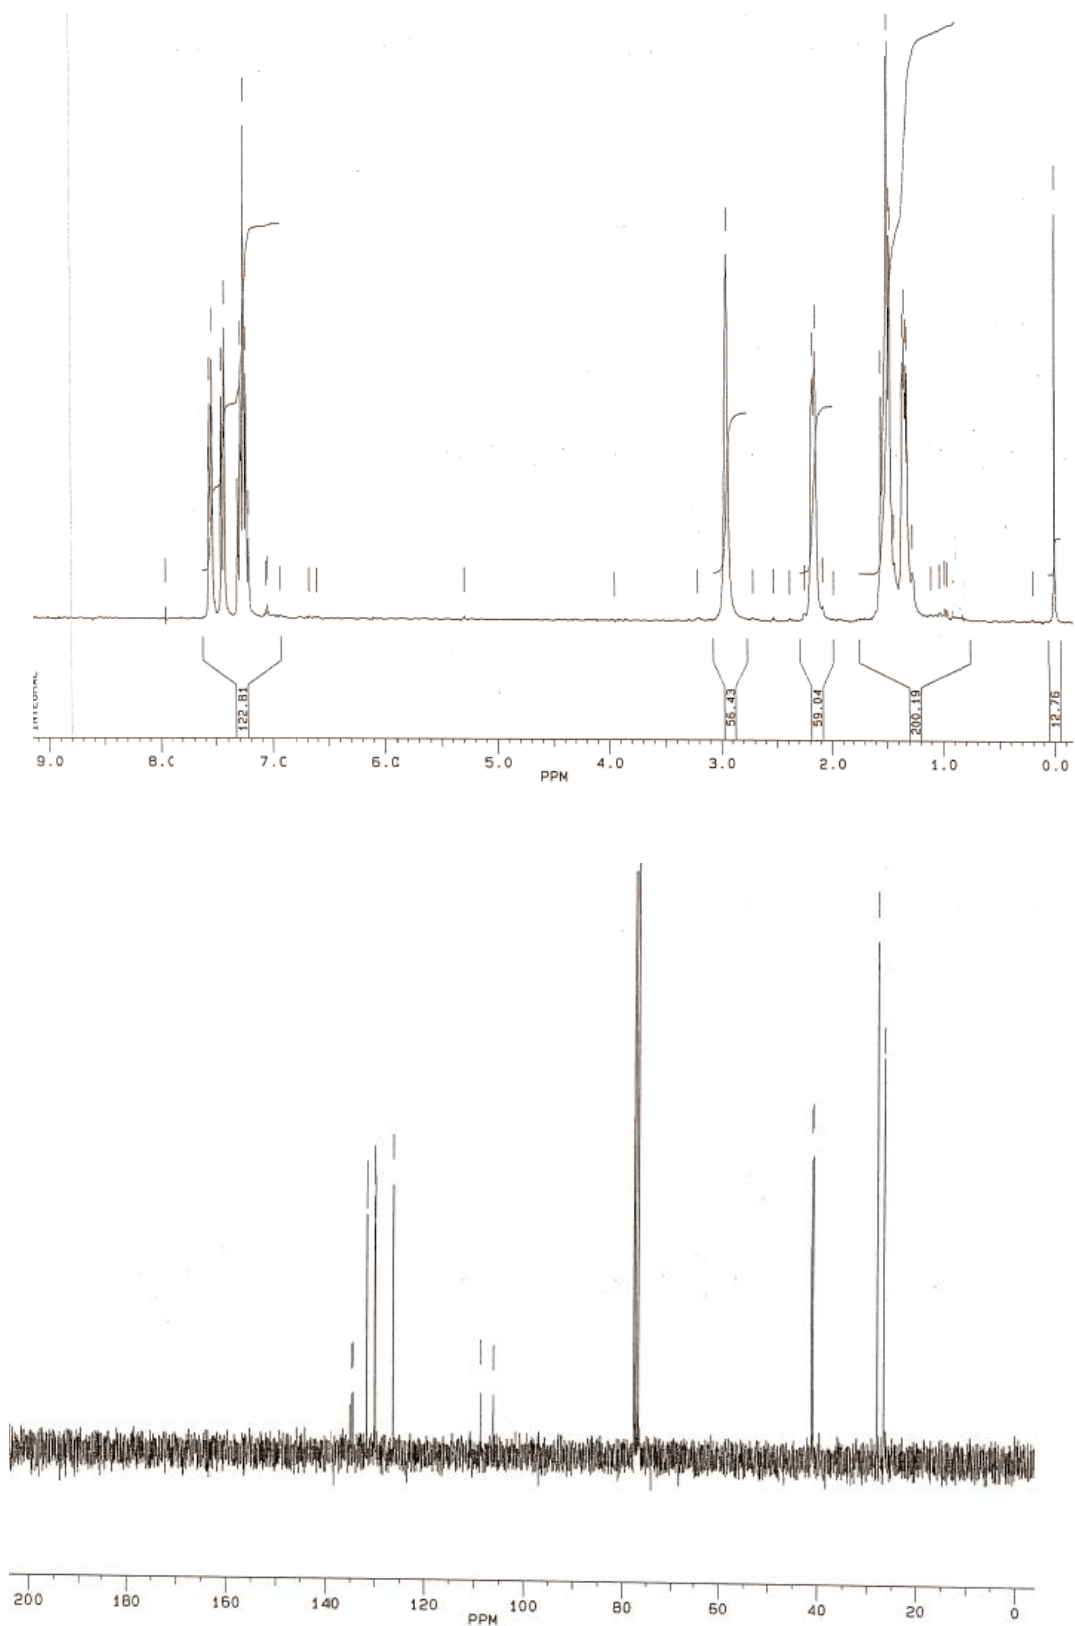

$^1\text{H}$ -NMR and  $^{13}\text{C}$ -NMR spectra of compound **9**

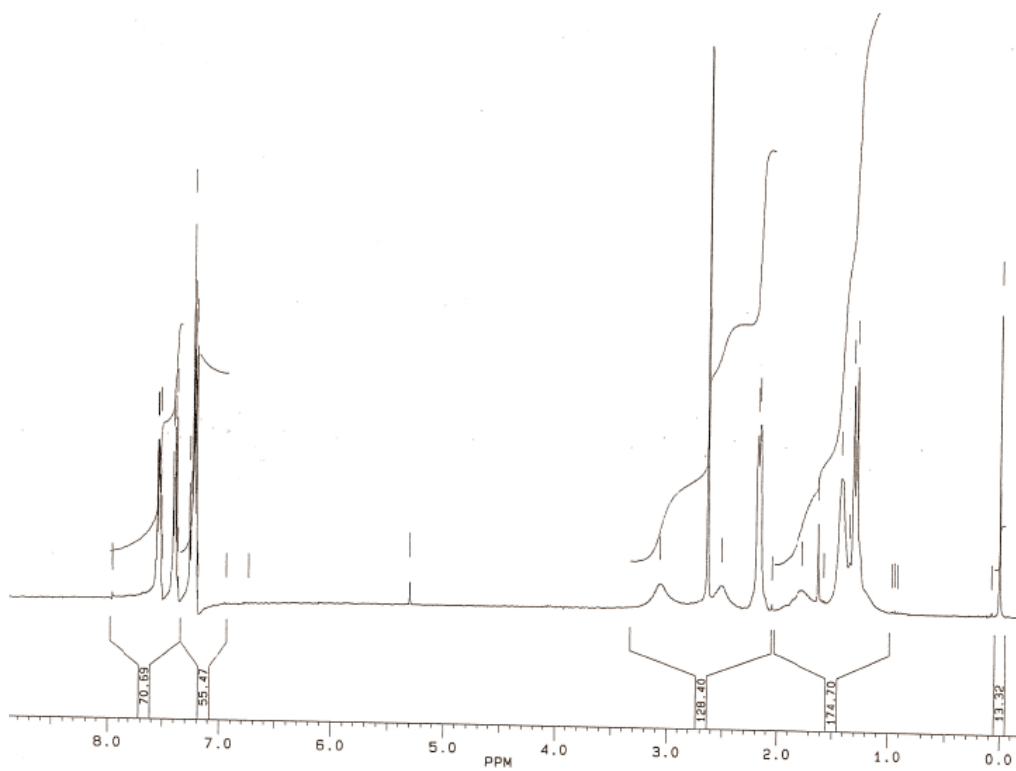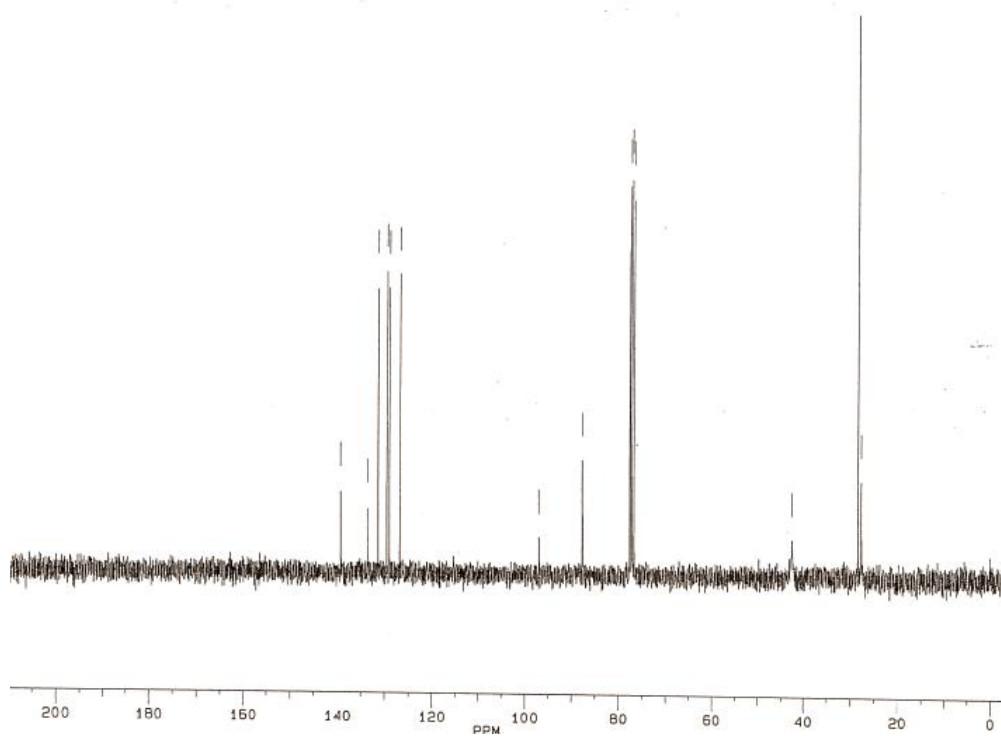

Cartesian coordinates (in Å) and total energies (in hartrees, ZPVE included) of all the stationary points discussed in the text. All calculations have been performed at the M06-2X/def2-TZVPP level.

**1, E = -801.762445**

|   |              |              |              |
|---|--------------|--------------|--------------|
| C | -2.215657000 | 1.530968000  | 0.776864000  |
| C | -0.735597000 | 1.329645000  | 1.130476000  |
| C | -0.216154000 | 0.416783000  | -0.000006000 |
| C | -0.735687000 | 1.330156000  | -1.130080000 |
| C | -2.215724000 | 1.531300000  | -0.776131000 |
| C | 0.005559000  | 2.635940000  | -0.778588000 |
| C | 0.005412000  | 2.635773000  | 0.779279000  |
| C | 1.262238000  | 0.125819000  | 0.000090000  |
| C | 1.960063000  | -0.021492000 | -1.196425000 |
| C | 3.318435000  | -0.299512000 | -1.198247000 |
| C | 4.004073000  | -0.439364000 | 0.000013000  |
| C | 3.317962000  | -0.301593000 | 1.198286000  |
| C | 1.959582000  | -0.023594000 | 1.196674000  |
| H | 1.435822000  | 0.073099000  | -2.138415000 |
| I | -1.187870000 | -1.546088000 | -0.000320000 |
| H | -2.589327000 | 2.463929000  | 1.196839000  |
| H | -2.589486000 | 2.464407000  | -1.195687000 |
| H | -0.568297000 | 0.973127000  | -2.142968000 |
| H | -0.567916000 | 0.972447000  | 2.143251000  |
| H | 1.435027000  | 0.068914000  | 2.138641000  |
| H | 3.839909000  | -0.413773000 | 2.139245000  |
| H | 5.063382000  | -0.657681000 | 0.000019000  |
| H | 3.840446000  | -0.410119000 | -2.139329000 |
| H | -0.507888000 | 3.499826000  | -1.198183000 |
| H | 1.022583000  | 2.630064000  | -1.166196000 |
| H | -0.508574000 | 3.499339000  | 1.198855000  |
| H | 1.022348000  | 2.630398000  | 1.167144000  |
| H | -2.829023000 | 0.722072000  | -1.166911000 |
| H | -2.828958000 | 0.721655000  | 1.167437000  |

**2, E = -3078.327038**

|    |              |              |              |
|----|--------------|--------------|--------------|
| C  | -2.611456000 | 0.715958000  | 0.777022000  |
| C  | -1.123197000 | 0.849908000  | 1.130215000  |
| C  | -0.421743000 | 0.070121000  | -0.000021000 |
| C  | -1.123313000 | 0.850437000  | -1.129812000 |
| C  | -2.611535000 | 0.716285000  | -0.776520000 |
| C  | -0.685508000 | 2.285040000  | -0.778532000 |
| C  | -0.685360000 | 2.284651000  | 0.779562000  |
| C  | 1.085797000  | 0.091325000  | -0.000019000 |
| C  | 1.796726000  | 0.085920000  | -1.197053000 |
| C  | 3.183505000  | 0.083645000  | -1.198730000 |
| C  | 3.882151000  | 0.083533000  | 0.000056000  |
| C  | 3.183430000  | 0.081604000  | 1.198810000  |
| C  | 1.796663000  | 0.083878000  | 1.197053000  |
| H  | 1.262844000  | 0.074225000  | -2.138052000 |
| Br | -0.931771000 | -1.852619000 | -0.000460000 |
| H  | -3.183426000 | 1.541517000  | 1.198637000  |
| H  | -3.183581000 | 1.541998000  | -1.197729000 |
| H  | -0.878693000 | 0.536204000  | -2.141184000 |
| H  | -0.878445000 | 0.535205000  | 2.141408000  |
| H  | 1.262707000  | 0.070520000  | 2.137987000  |
| H  | 3.718778000  | 0.075674000  | 2.138834000  |
| H  | 4.963676000  | 0.081255000  | 0.000086000  |
| H  | 3.718903000  | 0.079320000  | -2.138735000 |
| H  | -1.376433000 | 3.015429000  | -1.196924000 |

|   |              |              |              |
|---|--------------|--------------|--------------|
| H | 0.308034000  | 2.502561000  | -1.166877000 |
| H | -1.376137000 | 3.014898000  | 1.198449000  |
| H | 0.308278000  | 2.501879000  | 1.167833000  |
| H | -3.025777000 | -0.211184000 | -1.165717000 |
| H | -3.025694000 | -0.211658000 | 1.165878000  |

**3, E = -964.331942**

|    |              |              |              |
|----|--------------|--------------|--------------|
| C  | -2.803725000 | -0.158938000 | -0.730938000 |
| C  | -1.351529000 | -0.543639000 | -1.052619000 |
| C  | -0.543983000 | 0.323837000  | -0.065842000 |
| C  | -1.311289000 | -0.176932000 | 1.176207000  |
| C  | -2.775986000 | 0.090908000  | 0.802403000  |
| C  | -1.057510000 | -1.689949000 | 1.064985000  |
| C  | -1.101439000 | -1.947042000 | -0.470855000 |
| C  | 0.952505000  | 0.118007000  | -0.036749000 |
| C  | 1.672640000  | 0.413750000  | 1.118454000  |
| C  | 3.048103000  | 0.250713000  | 1.158635000  |
| C  | 3.728197000  | -0.207978000 | 0.038341000  |
| C  | 3.022501000  | -0.494077000 | -1.120281000 |
| C  | 1.644331000  | -0.329922000 | -1.156765000 |
| H  | 1.152906000  | 0.787488000  | 1.991160000  |
| Cl | -0.811460000 | 2.095222000  | -0.354725000 |
| H  | -3.486056000 | -0.958743000 | -1.015424000 |
| H  | -3.443485000 | -0.573020000 | 1.350310000  |
| H  | -1.005469000 | 0.264299000  | 2.121634000  |
| H  | -1.087650000 | -0.427578000 | -2.101095000 |
| H  | 1.106521000  | -0.553529000 | -2.068432000 |
| H  | 3.544057000  | -0.845113000 | -2.000772000 |
| H  | 4.801731000  | -0.336862000 | 0.067894000  |
| H  | 3.590557000  | 0.485246000  | 2.064756000  |
| H  | -1.814620000 | -2.254887000 | 1.606798000  |
| H  | -0.084229000 | -1.956346000 | 1.474749000  |
| H  | -1.898399000 | -2.631848000 | -0.756842000 |
| H  | -0.160147000 | -2.366131000 | -0.821385000 |
| H  | -3.058036000 | 1.115700000  | 1.033712000  |
| H  | -3.099757000 | 0.740134000  | -1.266598000 |

**4, E = -603.980805**

|   |              |              |              |
|---|--------------|--------------|--------------|
| C | -1.565286000 | 1.009331000  | -0.618375000 |
| C | -0.912657000 | -0.143960000 | -0.199727000 |
| C | -1.663705000 | -1.169140000 | 0.371390000  |
| C | -3.033614000 | -1.039111000 | 0.533040000  |
| C | -3.674227000 | 0.123749000  | 0.124577000  |
| C | -2.937816000 | 1.145587000  | -0.454028000 |
| C | 0.571097000  | -0.344970000 | -0.389548000 |
| C | 1.436626000  | 0.885249000  | -0.703103000 |
| C | 2.829593000  | 0.244440000  | -0.801575000 |
| C | 2.791035000  | -0.859792000 | 0.294616000  |
| C | 1.368014000  | -0.745083000 | 0.863671000  |
| C | 1.266436000  | 0.538432000  | 1.694553000  |
| C | 1.364021000  | 1.663719000  | 0.620892000  |
| F | 0.727250000  | -1.316591000 | -1.381456000 |
| H | -1.169376000 | -2.081652000 | 0.679590000  |
| H | 3.612997000  | 0.982046000  | -0.632722000 |
| H | 3.538074000  | -0.707550000 | 1.072943000  |
| H | 1.012799000  | -1.640103000 | 1.369932000  |
| H | 1.146657000  | 1.450627000  | -1.586255000 |
| H | -1.004266000 | 1.809946000  | -1.081750000 |
| H | -3.430928000 | 2.050567000  | -0.783218000 |

|   |              |              |              |
|---|--------------|--------------|--------------|
| H | -4.743185000 | 0.229624000  | 0.253223000  |
| H | -3.602506000 | -1.844727000 | 0.977807000  |
| H | 2.059917000  | 0.596880000  | 2.438157000  |
| H | 0.312558000  | 0.587623000  | 2.219268000  |
| H | 2.248621000  | 2.286039000  | 0.750864000  |
| H | 0.493899000  | 2.316307000  | 0.664077000  |
| H | 2.956955000  | -1.841983000 | -0.142692000 |
| H | 2.985435000  | -0.195036000 | -1.784415000 |

**5a,** E = -1063.586307

|    |              |              |              |
|----|--------------|--------------|--------------|
| F  | 0.927201000  | -0.571083000 | -1.845072000 |
| C  | 0.768980000  | -0.289384000 | -0.486930000 |
| C  | 1.557855000  | 0.978248000  | -0.111150000 |
| C  | 1.472135000  | 0.940189000  | 1.420352000  |
| C  | 1.536283000  | -0.582822000 | 1.743342000  |
| C  | 1.659395000  | -1.229588000 | 0.358053000  |
| C  | 3.051251000  | -0.933155000 | -0.211881000 |
| C  | 2.982429000  | 0.583420000  | -0.531115000 |
| C  | -0.721430000 | -0.418619000 | -0.200638000 |
| C  | -1.659097000 | 0.605437000  | -0.060153000 |
| C  | -3.004549000 | 0.335458000  | 0.173793000  |
| C  | -3.455833000 | -0.967671000 | 0.245993000  |
| C  | -2.556446000 | -2.008713000 | 0.070456000  |
| C  | -1.221755000 | -1.724773000 | -0.146661000 |
| C1 | -1.268255000 | 2.295166000  | -0.197062000 |
| H  | -0.533223000 | -2.543411000 | -0.297664000 |
| H  | 3.720825000  | 1.166079000  | 0.018583000  |
| H  | 3.830384000  | -1.181075000 | 0.508173000  |
| H  | 1.393757000  | -2.282569000 | 0.332735000  |
| H  | 1.220804000  | 1.900155000  | -0.566258000 |
| H  | -3.688189000 | 1.164747000  | 0.285010000  |
| H  | -4.503816000 | -1.164751000 | 0.425883000  |
| H  | -2.891588000 | -3.036205000 | 0.101484000  |
| H  | 2.382909000  | -0.845584000 | 2.375982000  |
| H  | 0.628610000  | -0.910765000 | 2.249687000  |
| H  | 2.291218000  | 1.498175000  | 1.871877000  |
| H  | 0.540474000  | 1.376875000  | 1.778013000  |
| H  | 3.231737000  | -1.511408000 | -1.115681000 |
| H  | 3.136329000  | 0.763492000  | -1.592876000 |

**6a,** E = -1063.591140

|    |              |              |              |
|----|--------------|--------------|--------------|
| C1 | -0.842908000 | -1.631802000 | -1.315594000 |
| C  | -0.624423000 | -0.170830000 | -0.267251000 |
| C  | -1.360604000 | -0.312273000 | 1.085994000  |
| C  | -1.151808000 | 1.097752000  | 1.658564000  |
| C  | -1.291251000 | 2.015172000  | 0.407821000  |
| C  | -1.496869000 | 1.010888000  | -0.743170000 |
| C  | -2.919082000 | 0.447641000  | -0.611811000 |
| C  | -2.829511000 | -0.442937000 | 0.657842000  |
| C  | 0.861751000  | 0.087037000  | -0.200634000 |
| C  | 1.701683000  | -0.718934000 | 0.560851000  |
| C  | 3.066783000  | -0.529888000 | 0.634946000  |
| C  | 3.641465000  | 0.502892000  | -0.089382000 |
| C  | 2.842844000  | 1.318153000  | -0.876869000 |
| C  | 1.473315000  | 1.104578000  | -0.928753000 |
| F  | 1.177766000  | -1.741813000 | 1.253525000  |
| H  | 0.863441000  | 1.741238000  | -1.554428000 |
| H  | -3.494332000 | -0.109074000 | 1.453518000  |
| H  | -3.645247000 | 1.252925000  | -0.511756000 |
| H  | -1.264872000 | 1.391539000  | -1.735138000 |

|   |              |              |              |
|---|--------------|--------------|--------------|
| H | -1.006652000 | -1.115341000 | 1.722651000  |
| H | 3.654219000  | -1.195620000 | 1.251439000  |
| H | 4.709733000  | 0.663002000  | -0.041620000 |
| H | 3.283888000  | 2.118984000  | -1.453788000 |
| H | -2.141013000 | 2.692354000  | 0.479761000  |
| H | -0.398061000 | 2.621048000  | 0.269070000  |
| H | -1.886905000 | 1.321861000  | 2.429959000  |
| H | -0.161885000 | 1.197219000  | 2.103017000  |
| H | -3.190804000 | -0.142427000 | -1.484038000 |
| H | -3.077725000 | -1.476255000 | 0.425860000  |

**TS1, E = -1063.571620**

|    |              |              |              |
|----|--------------|--------------|--------------|
| C  | 1.878626000  | -0.449962000 | -0.000064000 |
| C  | 0.690257000  | 0.304343000  | -0.000307000 |
| C  | 0.867065000  | 1.695255000  | -0.000211000 |
| C  | 2.105277000  | 2.310332000  | -0.000083000 |
| C  | 3.254526000  | 1.540024000  | 0.000012000  |
| C  | 3.128251000  | 0.166616000  | 0.000050000  |
| C  | -0.721503000 | -0.278984000 | -0.000282000 |
| C  | -1.708443000 | 0.103936000  | 1.133293000  |
| C  | -2.155807000 | 1.529263000  | 0.779445000  |
| C  | -2.156079000 | 1.529587000  | -0.778697000 |
| C  | -1.708917000 | 0.104415000  | -1.133285000 |
| C  | -2.887798000 | -0.823741000 | -0.779903000 |
| C  | -2.887610000 | -0.823909000 | 0.780055000  |
| F  | -0.601727000 | -1.658532000 | -0.000634000 |
| H  | 0.008245000  | 2.338409000  | -0.000147000 |
| Cl | 1.990168000  | -2.189353000 | 0.000198000  |
| H  | -3.816615000 | -0.439792000 | 1.198723000  |
| H  | -3.817047000 | -0.439971000 | -1.198355000 |
| H  | -1.315990000 | -0.019891000 | -2.139781000 |
| H  | -1.314958000 | -0.020673000 | 2.139532000  |
| H  | 2.162313000  | 3.390088000  | -0.000042000 |
| H  | 4.235260000  | 1.995213000  | 0.000113000  |
| H  | 4.004718000  | -0.465079000 | 0.000204000  |
| H  | -3.147415000 | 1.723274000  | -1.185884000 |
| H  | -1.495968000 | 2.287068000  | -1.195257000 |
| H  | -3.147071000 | 1.722589000  | 1.186982000  |
| H  | -1.495733000 | 2.286696000  | 1.196145000  |
| H  | -2.731981000 | -1.827459000 | -1.165740000 |
| H  | -2.732135000 | -1.827745000 | 1.165720000  |

**TS2, E = -1063.561825**

|    |              |              |              |
|----|--------------|--------------|--------------|
| C  | -1.964596000 | 0.822039000  | 0.000074000  |
| C  | -0.900199000 | -0.097408000 | -0.000454000 |
| C  | -1.337624000 | -1.435210000 | -0.000742000 |
| C  | -2.664362000 | -1.826899000 | -0.000526000 |
| C  | -3.669631000 | -0.876608000 | 0.000159000  |
| C  | -3.301985000 | 0.450309000  | 0.000453000  |
| C  | 0.606381000  | 0.235917000  | -0.000288000 |
| C  | 1.500688000  | -0.365476000 | 1.130586000  |
| C  | 1.582849000  | -1.862565000 | 0.779036000  |
| C  | 1.583679000  | -1.862936000 | -0.777944000 |
| C  | 1.501280000  | -0.366029000 | -1.130438000 |
| C  | 2.891513000  | 0.202390000  | -0.778794000 |
| C  | 2.891243000  | 0.202431000  | 0.779261000  |
| Cl | 0.818874000  | 2.032620000  | -0.000509000 |
| H  | -0.622181000 | -2.229409000 | -0.001371000 |

|   |              |              |              |
|---|--------------|--------------|--------------|
| F | -1.803745000 | 2.150599000  | 0.000361000  |
| H | 3.671112000  | -0.434952000 | 1.192768000  |
| H | 3.671829000  | -0.434574000 | -1.192091000 |
| H | 1.159384000  | -0.147764000 | -2.139404000 |
| H | 1.158298000  | -0.146515000 | 2.139233000  |
| H | -2.900049000 | -2.882131000 | -0.000856000 |
| H | -4.713264000 | -1.159263000 | 0.000444000  |
| H | -4.031320000 | 1.248113000  | 0.001157000  |
| H | 2.501681000  | -2.287033000 | -1.181167000 |
| H | 0.766823000  | -2.438535000 | -1.204622000 |
| H | 2.500252000  | -2.286832000 | 1.183430000  |
| H | 0.765236000  | -2.437565000 | 1.205076000  |
| H | 3.034726000  | 1.203418000  | -1.173591000 |
| H | 3.034898000  | 1.203382000  | 1.174107000  |
